# Supplementary material for: Discovery of ultrafast myosin, its amino acid sequence, and structural features
Source: PubMed Central journal article supplement (PMC8872768; doi:10.1073/pnas.2120962119), 2022-02-16
Supplement: pnas.2120962119.sapp.pdf [file pnas.2120962119.sapp.pdf]

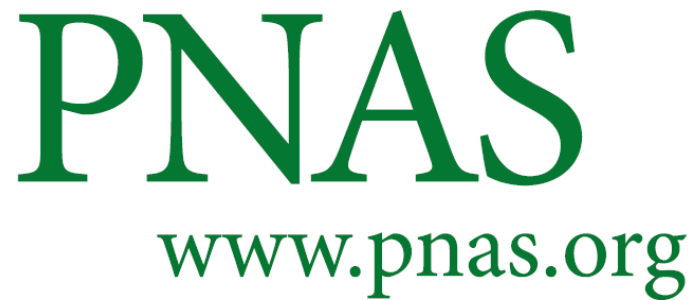

**Supplementary Information for  
Discovery of the fastest myosin, its amino acid sequence, and structural  
features**

Takeshi Haraguchi, Masanori Tamanaha, Kano Suzuki, Kohei Yoshimura, Takuma Imi,  
Motoki Tominaga, Hidetoshi Sakayama, Tomoaki Nishiyama, Takeshi Murata, and Kohji  
Ito

Corresponding authors:

Kohji Ito, E-mail: [k-ito@faculty.chiba-u.jp](mailto:k-ito@faculty.chiba-u.jp)

Takeshi Murata, E-mail: [t.murata@faculty.chiba-u.jp](mailto:t.murata@faculty.chiba-u.jp)

**This PDF file includes:**

Materials and Methods

Supplementary Text

Figures S1 to S5

Tables S1 to S4

Movies S1

S1 References

## Table of contents

|                                                                                                       |    |
|-------------------------------------------------------------------------------------------------------|----|
| <b>Materials and Methods</b> .....                                                                    | 3  |
| RNA extraction.....                                                                                   | 3  |
| Cloning of motor domain of <i>Chara braunii</i> myosins.....                                          | 3  |
| Protein engineering, Expression, and Purification.....                                                | 3  |
| Crystallization and Data Collection.....                                                              | 5  |
| The phylogenetic tree of <i>Chara</i> myosin XIs and the whole of myosin XIs.....                     | 6  |
| Identification of full-length sequence of <i>CbXI-4</i> .....                                         | 7  |
| <b>Supplementary Text</b> .....                                                                       | 8  |
| Amino acids sequence of <i>CbXI-1</i> .....                                                           | 8  |
| Amino acids sequence of <i>CbXI-2</i> .....                                                           | 9  |
| Amino acids sequence of <i>CbXI-3</i> .....                                                           | 11 |
| Amino acids sequence of <i>CbXI-4</i> .....                                                           | 12 |
| Amino acids sequence of <i>CcXI</i> .....                                                             | 14 |
| <b>Figure S1.</b> Schematic diagrams showing native <i>CbXI</i> and recombinant <i>CbXIs</i> . .....  | 16 |
| <b>Figure S2.</b> SDS-PAGE of purified myosins. ....                                                  | 17 |
| <b>Figure S3.</b> SDS-PAGE of purified chimeric <i>CbXI-1</i> showing calmodulin binding. ....        | 18 |
| <b>Figure S4.</b> Interaction of CM loop and loop4 of various myosins with actin.....                 | 19 |
| <b>Figure S5.</b> Structural comparison of pre-power stroke state and rigor state.....                | 20 |
| <b>Table S1.</b> Analysis of the IQ motif sequences of myosins using Pfam database.....               | 21 |
| <b>Table S2.</b> Crystallographic data collection and refinement statistics for <i>At XI-2 MD</i> ..  | 22 |
| <b>Table S3.</b> List of amino acids interacting between CM loop and loop 4 of myosins and actin..... | 23 |
| <b>Table S4.</b> Expression levels of <i>CbXIs</i> in <i>Chara braunii</i> .....                      | 25 |
| <b>Movies S1.</b> <i>in vitro</i> motility assay of chimeric <i>CbXI-1</i> .....                      | 26 |
| <b>References for Supplementary Information</b> .....                                                 | 27 |

## Materials and Methods

### RNA extraction

Thalli of strain S276 were harvested in soil-water medium for the Charales (SWC-3) (1) under controlled laboratory conditions at 23°C with a 16-h light: 8-h dark cycle with 24.5  $\mu\text{mol photons m}^{-2} \text{ s}^{-1}$  illumination provided by fluorescent lamps. The upper parts of thalli with reproductive organs were collected, frozen in liquid nitrogen, and stored at -80°C until further processing. Frozen samples were ground in liquid nitrogen. Total RNAs were then extracted with ISOGEN (Nippon Gene, Tokyo, Japan), and purified using the QIAGEN RNeasy Plant Mini Kit.

### Cloning of motor domain of *Chara braunii* myosins

cDNA of *CbXI-1* (g50407), *CbXI-2* (g48390), *CbXI-3* (g24025), and *CbXI-4* (g48658) motor domains (MDs) were amplified from total RNA of *Chara braunii*. The primers sequences used are as follows: 5'-TAGCGTCTCTTCAAATGGCA-3' and 5'-CGCACTCTCCTTGTCATCTTCTT-3' for *CbXI-1*, 5'-TATTTATAGTTCAGAATGGCGGAGC-3' and 5'-CCTGCGGCCAATTCTTTT-3' for *CbXI-2*, 5'-CTCAGGAGTGTCACCATGGG-3' and 5'-ACTCTGCGCTGGATCTTGAC-3' for *CbXI-3*, 5'-CTCACTCAGAATCATCATGGGGTC-3' and 5'-CTTCATTCTCTCATAGTCTTTACGCATCAG-3' for *CbXI-4*.

### Protein engineering, Expression, and Purification

#### *CbXI-1*, *CbXI-2*, *CbXI-3*, *CbXI-4* MDs and chimeric *CbXI-1*

A baculovirus transfer vector for *CbXI-1*, *CbXI-2*, *CbXI-3*, *CbXI-4* MDs (Fig. S1B) were generated as follows: The cDNAs of motor domains of *CbXI-1* (amino acid residues 1–745 of *CbXI-1*), *CbXI-2* (amino acid residues 1–751 of *CbXI-2*), *CbXI-3* (amino acid residues 1–747 of *CbXI-3*), *CbXI-4* (amino acid residues 1–742 of *CbXI-4*) with optimized insect *Trichoplusia ni* codons were artificially synthesized by Eurofins Genomics because the expression levels in insect cells were very low when native cDNAs were used. These were cloned into the pFastBac MD (2) using the In-fusion cloning kit (Takara). The

resulting constructs, pFastBac *CbXI-1*, *CbXI-2*, *CbXI-3*, *CbXI-4* MDs encode an N-terminal amino acids (MDYKDDDDKRS) containing the FLAG tag (DYKDDDDK), amino acid residues 1–745, 1–751, 1–747 or 1–742 of *CbXI-1*, *CbXI-2*, *CbXI-3*, *CbXI-4*, respectively, and C-terminal amino acids (GGGEQKLISEEDLHHHHHHHHSRMDEKTTGWRGGHVVEGLAGELEQLRARLEHHPQGQREPSR) containing a flexible linker (GGG), a Myc-epitope sequence (EQKLISEEDL), His tag (HHHHHHHH) and SBP tag (MDEKTTGWRGGHVVEGLAGELEQLRARLEHHPQGQREP).

A baculovirus transfer vector for chimeric *CbXI-1* (Fig. S1B) was generated as follows: cDNA of *CbXI-1* was mutated to create annealing sites at the 3' end of the MD of *AtXI-F* and the 5' end of the C-terminal of coiled-coil of *AtXI-F*. This was ligated to pFastBac *AtXI-F-HMM* (3) using the In-Fusion cloning kit (Takara). The resulting construct pFastBac chimeric *CbXI-1* encodes N-terminal amino acids (MDYKDDDDKRS) containing the FLAG tag, amino acid residues 1–741 of *CbXI-1*, amino acid residues 735–1,093 of *AtXI-F* (UNIPROT ID: F4IRU3), and C-terminal amino acids (GGGEQKLISEEDLHHHHHHHHSRMDEKTTGWRGGHVVEGLAGELEQLRARLEHHPQGQREPSR) containing a flexible linker, a Myc-epitope sequence, His tag and SBP tag.

A baculovirus transfer vector for *CbXI-1* 6IQ was generated as follows: The cDNAs of 6IQ motif of *CbXI-1* (amino acid residues 746–879 of *CbXI-1*) with optimized insect *Trichoplusia ni* codons were artificially synthesized by Eurofins. This was cloned into the pFastBac Flag *CbXI-1* MD Myc His SBP (this paper) using the In-fusion cloning kit (Takara). The resulting construct pFastBac *CbXI-1* 6IQ encode N-terminal amino acids (MDYKDDDDKRS) containing the FLAG tag, amino acid residues 1–879 of *CbXI-1*, C-terminal amino acids (GGGEQKLISEEDLHHHHHHHHSRMDEKTTGWRGGHVVEGLAGELEQLRARLEHHPQGQREPSR) containing a flexible linker, a Myc-epitope sequence, His tag and SBP tag.

### CcXI MD with loop mutants

*CcXI* MD with loop 2 of *CbXI-1*, *CcXI* MD with loop 3 of *CbXI-1*, *CcXI* MD with loop 4 of *CbXI-1*, *CcXI* MD with loop 4 of *CbXI-1*, and *CcXI* MD with loop 4 and CM loop of *CbXI-1* were synthesized by Eurofins Genomics. These were cloned into pFastBac *CcXI* MD (4) using the In-Fusion cloning kit (Takara).

### AtXI-2 MD

A baculovirus vector for *AtXI-2* MD motor domain (pFastBac Flag His TEV *AtXI-2* MD) was generated as follows: cDNA of *AtXI-2* (AGI code: AT5g43900.1, UNIPROT ID: Q9LKB9) was cloned from *Arabidopsis* seedlings. The motor domain of *AtXI-2* myosin contains residues 1-738 of the *AtXI-2* myosin heavy chain. The motor domain of *AtXI-2* was amplified by PCR. The gel-purified PCR fragment was cloned into the pFastBac vector using the In-fusion cloning kit (Takara). The resulting protein, *AtXI-2* MD has N-terminal amino acids (MDYKDDDDKRSMHHHHHHDYDIPTTENLYFQGA) containing the FLAG tag, His tag and TEV (ENLYFQG), amino acid residues 1-738 of *AtXI-2*. *AtXI-2* MD was expressed in insect cells (High Five™, Life Technologies) and purified using nickel-affinity and FLAG-affinity resins as previously described (4).

These constructs were expressed in insect cells (High Five™, Life Technologies) and purified using Ni-affinity and FLAG-affinity resins as previously described (2, 4, 5). *CbXI-1* 6IQ and chimeric *CbXI-1* were co-expressed with *Arabidopsis* calmodulin, CaM3 (AT3G56800) was as shown previously (5).

### **Crystallization and Data Collection**

The purified sample was incubated with 200 μM ADP, 1 mM AlCl<sub>3</sub>, and 5 mM NaF in this order for every 30 min on ice. The protein solution (0.1 μl; 4 mg/ml) was mixed with the reservoir solution (0.1 μl) consisting of 0.1 M MMT buffer (pH 6.0; Molecular Dimensions) and 25% PEG-1500. Crystals had grown at 296 K in sitting drops by vapor diffusion. The crystals were soaked for 1 min in 0.1 M MMT buffer (pH 6.0), 25% PEG-1500, 200 μM ADP, 1 mM AlCl<sub>3</sub>, and 5 mM NaF and 20% glycerol, and were frozen and stored in liquid nitrogen.

The X-ray diffraction data were collected from a single crystal at a cryogenic temperature (100 K) on BL-17A at the Photon Factory (Tsukuba, Japan). The collected data were processed using XDS software (6). The structure was solved by molecular replacement with Phaser (7) as a search model for *Dictyostelium discoideum* MD complexes with ADP-AIF<sub>4</sub> (PDB ID code; 1MND). The atomic model was built using Coot (8) and iteratively refined using Phenix (9). TLS (Translation/Libration/Screw) refinement was performed in late stages of refinement. The refined structures were validated with RAMPAGE (10). Homology models were built using Modeller 9.18 (11). All molecular graphics were prepared using PyMOL (The PyMOL Molecular Graphics System, Version 2.1.1, Schrodinger, LLC, New York, NY, USA).

### **The phylogenetic tree of *Chara* myosin XIs and the whole of myosin XIs**

Myosin homologs were collected from NCBI RefSeq database for *Arabidopsis thaliana*, *Amborella trichopoda*, and *Selaginella moellendorffii*, and *Physcomitrium patens* based on BLASTP search using the *CbXI-1* as a query. Another search for NCBI nr dataset were performed with organisms specified as Viridiplantae but excluding Spermatophyta. Further, ferns (*Salvinia cucullata* and *Azolla filiculoides*) (12), bryophytes (*Marchantia polymorpha* (13) and *Anthoceros agrestis* (14)), and Zygnematophycean algae (*Spirogloea muscicola* and *Mesotaenium endlicherianum*) (15) were searched for respective datasets. Those datasets were obtained from [ftp://ftp.fernbase.org/Salvinia\\_cucullata/Salvinia\\_asm\\_v1.2](ftp://ftp.fernbase.org/Salvinia_cucullata/Salvinia_asm_v1.2), [ftp://ftp.fernbase.org/Azolla\\_filiculoides/Azolla\\_asm\\_v1.1](ftp://ftp.fernbase.org/Azolla_filiculoides/Azolla_asm_v1.1), [https://phytozome.jgi.doe.gov/pz/portal.html#!info?alias=Org\\_Mpolymorpha](https://phytozome.jgi.doe.gov/pz/portal.html#!info?alias=Org_Mpolymorpha), [https://www.hornworts.uzh.ch/static/download/a\\_agr\\_oxford.zip](https://www.hornworts.uzh.ch/static/download/a_agr_oxford.zip), and [https://figshare.com/articles/Genomes\\_of\\_subaerial\\_Zygnematophyceae\\_provide\\_insights\\_into\\_land\\_plant\\_evolution/9911876/1](https://figshare.com/articles/Genomes_of_subaerial_Zygnematophyceae_provide_insights_into_land_plant_evolution/9911876/1), respectively.

Thus, 80 sequences were retrieved and aligned with *einsi* in MAFFT v7.475 (16). The alignment was read with Mesquite version 3.61 (17) and well-aligned regions were marked as included after excluding all characters, to ensure only well-aligned regions were used for the subsequent analyses. Two sets of the matrix were extracted from the entire

alignment; one including myosin VIII, and another confined to myosin XI excluding sequences having deletions in conserved regions, which may be either alternative splicing or misannotation. Sequences identical in the included region were regarded as a single OTU and one representative was retained during the analysis. Thus, green plant myosin dataset included 567 sites from 43 OTU and myosin XI dataset included 1060 sites from 32 OTU. Substitution model was chosen using ProteinModelSelection.pl from RAxML distribution. Standard RAxML version 8.2.12 (18) was used for the maximum likelihood tree search with -f a -# 100 option and 24 bits of random seed were provided from system random source /dev/urandom to -p and -x options. 1000 bootstrap datasets were prepared using seqboot from PHYLIP version 3.697 (19) and split to individual dataset and then run essentially the same RAxML command. The bootstrap trees were collected along with the original tree amplified 1000 times to force the consensus topology and the bootstrap value was counted using consense then subtracted for 1000 to recover the bootstrap value.

#### **Identification of full-length sequence of *CbXI-4***

Initially, g48658 was identified as a Myosin XI homolog and designated *CbXI-4*. The g48658 spanned almost entire range of the scaffold\_743 and appeared to contain only N terminal part. Thus, the transcript sequence (2554 bp) was used as a query to search several transcriptome assemblies of *Chara braunii*, which were constructed during the genome project but was not described (ref genome paper). A BLASTN (20) search to an assembly constructed with TransAbyss (21) found a 4242-bp contig, which is considerably longer than the query. This sequence was used to search the predicted transcriptome and found that g66754 has partially matching sequence without scattered mismatches. g66754 was located on the minus strand at the 3' end of scaffold\_8 and RNA-seq data suggested transcripts spanned to g66753 and g66745. The prediction by augustus (22) contained exons that were not linked with RNA-seq data overlapping introns and having similarity to retrotransposons. Thus, the g66745-g66753-g66754 locus was manually edited on WebApollo (23) to conform with the RNA-seq data with intron support, and two isoforms were retained. This sequence was connected to the 4242-bp contig of the RNA-seq assembly to end up in the two full-length nucleotide sequence of the transcripts.

## Supplementary Text

### Amino acids sequence of *CbXI-1*

>*CbXI-1*, Full-length: 1 -2690, MD: 1 -745, 1 IQ: 746 - 761, 2 IQ: 766 - 784, 3 IQ: 790 - 810, 4 IQ: 814 - 825, 5 IQ: 838 - 858, 6 IQ: 862 - 877, Coiled-coil: 883 - 924, 929 - 975, 988 - 1079, 1161 - 1188, 1265 - 1292, GTD: 2322 - 2690

MATFGVGSPPVVEDEEDMWIEATVLKIEADKVISKNRKGGEVSSKDMVHPRD  
EDTAEMGVDDMTRLSTYLHEPGVLDNLSRRYHLNQIYTYTGSICIAINPFQAVPHL  
VGTKLMEMFKVAQPGEVSQPHVYAVADRAYKAMMDEEKSQSILVSGESGAGK  
TEATKLIMNYLAFMGGRATPVAGERSVEQKVLESNPLLEAFGNAKTVRNNNSSR  
FGKFVEIQFNRGKISGAAVRTYLLERSRITQVSTPERSYHCFYQLCAGATAEEREK  
LKIEAAPNYFYLNQSECFEVPRFDEVVEYKATRHAMDVVGISTEEQDGIFRIVASI  
LHLGNVDFKPGKEADSSQLADDKSRFHLNCCAELLGANPKLLEDLSLQIRIMVTR  
GEAITKLLDKKQAVGSRDALAKTLYAKMFDWLVDKVNKSIGQDPNSNTLVGVL  
DIYGFESFTVNSFEQLCINLTNEKLQQHFNTHVFKMEQEEYVKEEINWDNIDFVD  
NIDVLDLIEKKPLGIIALLDEACMLPKSTPESFGQKLAQSFDKHKRFTKHKFKKTL  
FKIDHFAGEVEYSTDTFIEKNKDFVIAEHQQLLTASTDPFVRQVYPPPEEPKQGGK  
GGGKSSFSSIGTRFKQQLQSLMDTLNQTEPHYVRCVKPNQKLKPLMFEKRIVLQ  
QLRCSGVLEAVRISCAGFPTRRTFFEFADRFKILFPDAVANCGQDYKSACVKILE  
KIGLERYQIGTKVFLRAGQMAILDTRTEILNEAAKKMTRRVRTFLARNEYLR  
VKQASVCVQTRWRGVLAFLKLVFLKETRAATEMQRVVRGMQNFKAYREMKA  
ASIRIQAAVRSKCAKNLYKQLQEHLKAASIIQANWRACFATKSYKELLSSTILFQSA  
WRSKNARADLFDLKELAKEIDVLQDTKQKLESRVADLTSELATETKTRMDLEAQ  
RASEVAALEAQIADMARGQAEDTNKSIEKARRVHQUENLDQIKRDADDELERGLAA  
ELPAEAKKTIESLKQLNDKFLKVVKAATARTEEAEEKISAAEKKAEEALKEMQD  
VNAAAKALREQKAKEDAAALATMQKEKQKQEEVTKRLETESNSLRKTADKMA  
GLETDVVKVREETAATAEAVDTTEIEELRRTVADAVEIDPKEIEKLRKDSETVASL  
ESEAEKLQEEVKNAPKVPVELEELRAKVKKMEEDAAAAAAAAAAAAEAYQAEM  
DSLKEPAKKATDLQAEVEKVKKELEAMAAPSLDASELETIKKEAEKLASTAAST  
ACDPAELEKLRQEAQKVPALAEAAAGLQAQSQRVTVLEAENKSLQEQLSAAGV  
TPAPAVAAAPAYPGATPPAAASAYPGQAAIANPPSYPGAPAAAAPPYPGAPAA



AAPPAYPGAPAPVAAPVYPGAPATAAAPAYPGAPAPAPAPAYPGAPAPAPAY  
PGAPAPAATPAYPGAPAPAASPAYPGAPAPAAAQAYPGAPAPAAAQAYPGAPAP  
AATPAYPGGPAAVAAAPYPCPPSPSPATYHGGQVAESYAAQSLFNATQPASMT  
GTAPSPYLSTPEQQQQQQQVMMAAGPHAQQQMMASQQQQQQQQQQQASFP  
GARPGTPAQGVYPPQQQQGMMQQRAMTPDGKMGMMQQQLGQQMASPQIMPQQ  
QQQQAMMKMGGQSLFPQMGMGQQQSNQMSQDMQNVNGGAMGSQAGMGQQ  
QTNFGVGGIGSMGMGMGMGNMMDTAQGPQQGSADSQMAGALGGQ  
MVNGPMNPLMQALSSQMGMGNPLAQLAAQFGLGNATGPMGQMAPMGQAN  
PLAQLLMGMTGMGGMGGNMGMQGMQSMGNMGMMSGMGGHPGMDRGM  
RGMDRGMMDRQSTSMKNPFGFASLAHDWASRARSNLHREEMVVFQISRE  
DMDARPELGYSMQDDDQMLRSSQEGGFRRDSTEGRRDSEMRDMERDYD  
MRPGRDSDLRSSRDKFESRRDSAYDLRGSRDYESREYEMRGSRELDMRRADSQ  
RRGEYDSTRRESTGSRDFDPRRESREFDTRRSSLGSTREFDSRRDYDLRRESKDFD  
PRRESREFDSRRHSGSRDFDGSRRREFDTRRDFREFNDEPESRRDSRESDLRRDSL  
GSDLRRDSLRESESRREYRDLDSPTGRDLGARRERDLYSSRKESRARSSQRDAD  
DLGENEPRRSRRSHNEPVHSDGSPPTKTRSSSTRSSRGDALTKADAVSRRES  
VSELRSSRDSTADPRASTTDLRGSRTSEARSSQKESRFREAVSELRSSRKENPKN  
ERGPREDSEMETENTGRDIPVVEGLEADAPADPDRKLSRSRSVSSRQLLEQKRRK  
AALEKLQKDQGLLIHCISQDVGFSLNFPVAAGVVFKSLLHWNSFKSEHTRIFSRV  
VAVVISGIEGALDNDGLAYWLSNSTCLLNMQRTLRFSSDRRRSSKSGIYGS  
TGVDTSNLMEAQRPALVFRQQLVACTEKIFGTIRDNLTKIVAPLLPVCLKVQKSR  
RRSRVQAEDEVKVSNGYAAIVSTLDDLLDVMRKNMVFPVLTQSVVEQVFAN  
VHMFNSLQMRRECCYSNGLFVRDGLKMLDHWASDVGRQSSGRASEKLTHIRQ  
ATHFLIYDDKETATLEDITKIVCPDLNMHQLHRIATMYSDDANVCPGLSPEVVDD  
LADATQDSLTTETFLLTDDTSTPFTLDDIVIATSASLGEMMSVEPPQLLADSPSFQF  
LLSEAA

**Amino acids sequence of *CbXI-2***

>CbXI-2, Full-length: 1 -2239, MD: [1 -751], 1 IQ: 752 - 767, 2 IQ: 772 - 786, 3 IQ: 797 - 811, 4 IQ: 820 - 831, 5 IQ: 844 - 864, 6 IQ: 869 - 885, Coiled-coil: 889 - 930, 994 -1021, 1051 - 1102, 1167 - 1215, 1635 - 1664, GTD: 1861 - 2239

MAEQVAIGSPVWVEDAEDMWIEAVVMKIEAKKITSKNIKGTIVESSPEMVHPRD  
EDTKPLGVEDMTRLSYLHEPGVLDNLLRRYMEKEIYTYTGNICIAINPFQAVPHL  
VGTQLMEIFKNSQPGEVTQPHVYAVADRAYKAMLDEGQSQSILVSGESGAGKT  
EATKLIMNYLAFMGGRSGGAASSGGVRTVEQKVLESNPLLEAFGNAKTVRNNN  
SSRFGKFVEIQFNGTKISGAAVRTYLLERSRVTQVSTPERSYHCFYQLCAGASEE  
DRAKMKIGKASDYHYLNQSECFEVPRIDDKEEYSITRNAMDVVGISEEEQDGIFR  
IVAAILHLGNIEFAPGKDADSSKIADEKSRYHLEACAELLACDPNLLEYSLIQRVM  
MTGTEKIKLLNKTAALGSRDALAKTLYAKMFDWL VQKVNVSIGQDATSTTLV  
GVLDIYGFESFKVNSFEQLCINLTNEKLQQHFNNHVFKMEQQEYIREEINWSNID  
FVDNIDVLDLIEKKPVGIIALLDEACMLPKSTPESFAAKLYGSFDKHKRFGKHKF  
KKTLFRIDHFAGEVEYSTETFIEKNKDFVITEHQELLMNSKDPFIRDVYPPPEEPK  
QGGGKGGSKSSFSSIGTRFKQQLQSLMETLNATEPHYVRCVKPNQLLKPLNFDK  
RIVLQQLRCSGVMEAVRISCAGFPTRRTFFEFQDRFKVLYPDVVAQCGEDYRLA  
CVKVLERTGLEDYQIGKTKVFLRAGQMATLDARRQTILNAAA|KRIGRRVRTFLA  
REEYLRWRAGATVMQTRWRGVMAFNLF TWLRQMAAATEMQRVYVRGMQAFG  
RYREMKAASIRVQAAVRSLCAKNELHRLQEHRAASIMQANWRACFASKCYKEV  
LSSSVVFQSAWRSKNARADLRD|LKELEASEIAVLTDVKQKLEGDLSGLQQELTKE  
VGTRTDLEAQRAAEVTSLESTTEEVC KDVSATKAEIGKGREKHAEDLREIKQRSE  
EDLEVGLSAELPPQAKKT|IEGLKQTNEQFKKASEAATARIAAAMAKVTAAETAT  
NECLNEMTEVNAAAAALRAQK|AKEDAEIAEMKAEIAKLEVDKRLRSNTSL  
ARVARRLDHLETQVEKFRDEEYEASNVDTTEIDELRRTVADVVEIDPKEIESLRK  
KADSVAALEGEEEKLQDDIRKAPKIDPEE|VERLKQQVQKWEEEEAAAAAAVDA  
AKRAAEAKTAELESLRAEVTRMNGIQADLVKMKSTLVSISVRQCLDAAEMEAIK  
EEAKRSVVIPPPPEPPVPLAEILALKTDQAQVPALIEIQLSLKAQSQKVL TLEAE  
NSTLREQAARAAEPPPPPPQPSAAAPSPYGAAPQGSPVAVMAASGHQQHMTPPGS  
PPMDAMRVSAEGPLSAQGTATVSQMRAGAVGMHPQSSMASNPMTPMANPM  
MANAMANPMMANPMANPMANPMANPMANQMMANPMMANPMMANPMMANPM

MANPMMANPMMAMQTNPMAQLMAMQMGLNPMAAMMGFNPFMNPMMEQ  
 MGMSMGPMGHMGMMPMAAMMMSQMGGGMDIPGMGPAAQSMAGSTADKS  
 NSNIKKKNAATSTGKKSSSKRVAADGSTGTTKSGRNAAAASSTNGLGMGGM  
 GFGGMANFFNPMAARMQEMFKMMQAQSSNASGSQNRDKDEEGNAEQQQQQQQ  
 EEEEEDEEEEQLSLPNAMGADKLRMSRESRLHSGRTSRGKSGNAALYRESVA  
 DLRLRREKREGMMGEGRLVRGKKMTDATRVAARAQRHSIADLSFAHATKG  
 TPVHASERGSATSREALPQNGGESTVEDDYKEAAAENAEPNGDASAPLVPDT  
 SAAVEAPEPVTPPLIRSRDVRMSQDQKKRRAMMEQIQRDQGLLVQSIMQDVGFE  
 HGIPVAAAVVFRCLLHWHSFESEHTRVFSRIINVVSGIQTTMDSNDGLGYWLSN  
 TSVLLVLMQQLRFSSGRRSLSRKSMIYGSGKGHLGMEMAKNIEGQRPAMVFK  
 QQVNACLERAFGIIRDNVTKDIFGHLSACIKAPKSPDNSPLRLSRNSLVTEDDGS  
 SGGWGSIIILDQFMNSMKANFVLPVLRKLFIQIFGMDINLFSIIMRRECCSYS  
 NGEFIMEGLMEIKLWLDDREQYAGGAWEELAHIRQAADFLVYKQKSSASADELI  
 ANLCSSLTIHQIHLASLYVDNTNMRPGLSPEVLQTLADKSHSSFADSCMLADDE  
 RIPFSVDEIIDDAALSTREVMVQAPTMLRENPSFRFLVDVTD

**Amino acids sequence of *CbXI-3***

>*CbXI-3*, Full-length: 1 -1625, MD: 1 -747, 1 IQ: 748 - 764, 2 IQ: 768 - 787, 3 IQ: 794 - 811, 4 IQ: 815 - 831, 5 IQ: 842 - 859, 6 IQ: 864 - 882, Coiled-coil: 885 - 912, 920 - 972, 979 - 1110, GTD: 1230 - 1625

MGSEEV RAPG GASAVLAVGSPVWIEDPEKAWIEATVVKIDGVVVTARTINGDLV  
ETTLANGIPRDEDVTMRGVDDMTKLSYLHEPGVLHNLTRYKHDEIYTYTGNIL  
IAVNPFTRLPHLFNQYMMKQYQDAQPGDLNPHVYSVAGAAAYKAMMDENKSQS  
ILVSGESGAGKTETTKQIMQYLA FVGGRTVGDNRSVERQVLQSNPLLEAFGNAK  
TVRNNNSSRFGKFVEIQFNKGKISGAAVRTYLLERSRVTQISTPERNYHCFYQLV  
AGASPEDVERLKLGPPEFSHYLNQSKCVEVGTIDDCKEYQLTREAMDVVGIGAE  
EQEAI FRTIAAVLHLGNIEFSTGASEASEVSSEKAKFHLRAAAEILMCDEKMLEKS  
L TTRIMRASRTESITKILDKSQATDNRDALARTIYAKLFDWLVDKVNKSIGQDLH  
STVLIGVLDIYGFESFDINSFEQFCINLTNEKLQQHFNTHVFKMEQAEYRKEEINW  
DDIDFVDNIDVLDLIEKKPGGIALLDEACMFPKSTAESFASKLGSTFQSHRRFSRP

KFKRTAFTIDHYAGQVEYRADLFLEKNKDYVVPEHQQLLHASKCPFVAALFPPD  
EGTKAPSKFASIGSQFRLQLASLMDTLKLTAPHYIRCVKPNMQLKPQIFENKNVL  
QQLRCSGVLEAVRISCAGFPTRRTFGDFLDRFGLLHPEVLVESADEKAACQILLE  
KCNLKG YQIGKTKVFLRAGQMAILDTKRSNVLNEAA VKIQRRVKTFILMSRDYQ  
RRKDASVLVQAYWRGTMARLEFRFLREQISAICFQRYIRGYLARKNYLEMRAA  
IRIQSAVRSLAARTVLC TLQDNFAATQIQSKWRSYLA SRSYNGLLRSCIFFQGA W  
RCKEARSELKKLRQAARETGALREAKNRLEKKCEELTLRLGLSRDDLIAKNNEL  
AKLQSAMEEMQVQAEQMKALMAKEREVYEAELAQA KATAAQLVDAEMAAQP  
SKEVLEEIKALTEENEK LKKHVEDYEKKKALAERSAKRIEEADSKLDTMQELLG  
RMEEQVQNLISENQSLQSEKQNLQSEN RILMQQALSMKDLESENQDLQRNLKHL  
EADSQALKSENQAL KQQLEQRTWTNNKDSSAAVKVGPSPLVSPRIERIPAFSNG  
LPQIKVITPAADPVP AEKIWMPKPKIVVSAPHADGQLREETPRTPAYAPPVASLGS  
PGVKAPAVD HKISKMMHDKLQNDQEALLACVMQDVGFSNDHPVA AVIIFKCLL  
QWHSFEAERTNVFDRIISAIQTAIDSHSGNNDVLGYWLSNTSTLLYLLQRTLKAS  
GGGGTAPQRRRQTTLFGRMTQRFSSQQQNYPNGMGP IGLDNVRQVEAKYPALL  
FKQQLTAYVEKIYGMVRDNLKKEITPLLGSCIQAPR APRHPLGRKVSPAPGQQVL  
SSHWGSIINSL LKLLNLRGNKVPYLV RKIFTQIFSFINVQLFN SLLLRRECCSFSN  
GEYIKAGLAQLEHWIYEAGEEYAGASWEELRYIRQAVGFLVIHQPKKSLDEIM  
HDLCPALSIQQLYRISTMYWDDKYGTHTVAPEVIQNM RILMTEDSNNAVSNSFL  
LDDDSGIPFSVDDISKSMPEVDLSEVYPPLLKDIPSFRFLQPEKE

**Amino acids sequence of CbXI-4**

>CbXI-4, Full-length: 1 -1815, MD: [1-742], 1 IQ: 743 - 758, 2 IQ: 764 - 782, 3 IQ: 789 - 806, 4 IQ: 811 - 827, 5 IQ: 836 - 854, 6 IQ: 859 - 875, Coiled-coil: 880 - 907, 915 - 949, 974 - 1105, GTD: 1420 - 1815

MGSEEARSAALGIGSPVWVEDVENAWIEATVVKRDGDAVTARTVHGDLVETR  
MANALPRDEDVTMRGVDDMTKLSYLHEPGVLHNLYARYKHDEIYTYTGNILIA  
VNPFTRLPHLFNTYMMKQYQDAQPGDLNPHVYSVADAAYKAMMEEMKSQSIL  
VSGESGAGKTETTKQIMQYLAFVGGRTVGDNR SVEQQVLQSNPLLEAFGNAKT  
VRNNNSSRFGKFVEIQFNNGKISGAAVRTYLLERSRVTQISTPERNYHCFYQLVA

GASHEDAERLKLGPDSFHYNQSKCVEVGAIDDCKEYQLTREAMDIVGITTEE  
QEAFRTIAAVLHLGNIEFNSEGESEASEVSTEKSKFHLKAAADMLMCDEEMLEKS  
LTTRIMKATRRESITKILNKSQATDNRDALARTIYAKLFDWLVNKNKVSIGQDPH  
STVLIGVLDIYGFESFEINSFEQFCINLTNEKLQQHFNTHVFKMEQAEYRKEEINW  
DDIDFVDNIDVLDLIEKRPLGIIALLDEACMLPRSTAESFARKLGDTFHNHKRFSK  
HKFKRTAFTIDHYAGQVEYRADLFLEKNKDFVPEHQQLLHASKCAFVSGLFPL  
DEGAKAPSKFMSIGSQFKLQLATLMETLKLAAPHYIRCVKPNMQLKPQIFENKN  
VLQQLRCSGVLEAVRISCAGFPTRRTFEEFLDRFGLLHPEVLIESADEKVACQNLL  
EKCNLKG YQIGKTKVFLRAGQMAILDTKRSNVLNEAA VKIQH MVQSFLMRKDY  
ERMKSASLLVQAYWRGTMARLEFRFLREQVSAVCFQRYIRGYLAQKNYLKMQ  
QAAIRIQSAVRSLAARRFLCFLEDNHAATQIQSKWRSYVAFRSYDELLRSCIVFQ  
GAWRCKEARSEIKKLRQAARETGALREAKNRLEKKCEELTRLGLAKVSLIARN  
SELAKLQSAMEEAKAQVEQMKMLVAKERKGHEADLAQAKVAAAQLLDAKMS  
AQPSKEVLDKIEALSEENTKLKKLVEDYEKKKALAESSAKRIEEADLKRDMQE  
LLSRSEEQVQNLISENQSLQSEKENLQSENRI LRQQALNMKDL ESENQDLQRNLT  
HLETNSQALRAENETLKQQLEQLTSKGGTAVKIGQPAVTPWLEATD TVYGMMSG  
HETGVPRRDFRQYAGRGQVEGNKIVPNALHSQEELGTEPSSVHRLGPSARNTVV  
EAKPEDSMIVADSANGLGNSDAKASAGTRMQTRADYVGAQDYVTHTQMMQPF  
ESSPSTDDRNAPSPASQPLHCVESASVSTLDRPDHRRAAQGSRVDLLAQGPRQYE  
SRTGQRDTGHSVYGSRPEPR TALSTGLSRLSHRPETGTLIKPTPEPVITTSYPDEQP  
TTPGVTGPGTPSRPLGRSQHIRRESSDYMSLYLPEDSPVPEAKPVDQKKSKMMPD  
KLQSDQEALFDCLMQDVGFSKDHPVAAVIIFKCLLQWHSFEAERTNVFDRINAI  
QTAIESHSDNNDVLA YWLSNTSTLLHLLQRTLKAGGGGGTTPQRRRQTTLFGRM  
TQRFSSQQQNYPNGTGPIGLDNVRQVEAKYPALLFKQQLTAYVEKIYGMLRDNL  
KKEITPLLGSCIQAPRAPRHQLGRKVSLAPGQQVLSSHWGSII NSLLKLLNLRGN  
KVPPYLVRKTFTQIFSFINVQLLNSLLL RRECCSFSNGEYIKAGLAQLEHWIYEAG  
EEYAGASWEELRYIRQAVGFLVIHQPKKSLDEIMHDLCPALSIQQLYRISTMYW  
DDKYGHTTVAPEVIQNMRILMTEDSNNAVSNSFLLDDDSGIPFSVDDISKSMPEV  
DLSEVHPPPLLKGMPSFRFLQPEKA

## Amino acids sequence of CcXI

>CcXI, Full-length: 1 -2182, MD: 1 -746, 1 IQ: 747 - 762, 2 IQ: 767 - 786, 3 IQ: 793 - 810, 4 IQ: 814 - 832, 5 IQ: 840 - 858, 6 IQ: 863 - 879, Coiled-coil: 884 - 911, 978 - 1208, 1234 - 1327, 1353 - 1446, 1472 - 1631, GTD: 1787 - 2182

MGLEKARSSALGIGSPA WVEDVETVWIEATVVKLDGDAITARTVNGDLVETTM  
ANALPRDEDVTMRGVDDMTKLSYLHEPGVLHNL YTRFKHDEIYTF TGNILIAVN  
PFTRLPHLFNTYMMKQYQDAQPGDLNPHVYSVADAA YKAMMEEMKSQAILVS  
GESGAGKTETTKQIMQYLAFVGGRTVGDERSVEQQVLQSNPLLEAFGNAKTVR  
NNSSRFGKFVEIQFNNGKISGA AVRTYLLERSRV TQISSPERNYHCFYQLVAGA  
SPEDAERLKLGPDSFHLYLNQSKCVEVGAIDDCKEYQLTREAMDIVGITTEEQEA  
IFRTIAAVLHLGNIEFDSGESDASEVSTEKSKFHLKAAAEMLMCDEQMLEKSLTT  
RIMKATRTE SIKILNKSQATDNRDSIAKTIYAKLFDWLVNKVNK SIGQDPHSTV  
LIGVLDIYGFESFEINSFEQFCINLTNEKLQQHFNTHVFKMEQAEYRKEEINWDNI  
DFVDNIDVLDLIEKKPLGIALLDEACMLPRSTAESFARKLGDTFNNHRRFSKHKF  
KRTAFTIDHYAGQVEYRADLFLEKNKDFV VPEHQQLLHASRC AFVSGLFPAD EG  
TKAPSKFMSIGSQFKLQLAALMETLKL TAPHYIRC VKPNMQLK PQIFENKNVLQ  
QLRCSGVLEAVRISCAGFPTRRTFE EFLDRFGL LHPEVLIESAEESADEK VACQNL  
LEKCNLKG YQIGKTKVFLRAGQMAILD TLRSNVLNEAA VKIQH MVQSFLMRRD  
YERMKRASLLVQAYWRGTMARMEFRFLREQVSAVCFQRYIRGYLAQKNYFEM  
RQAAIRIQSAIRSLAARRVLCV LQDNHAATQIQSKWRSYVAFRSYDELLRSCKVF  
QGAWRCKEARSEIKKLRQAARETGALREAKTRLEKKCEELTLRLGLAKVSLIAR  
NSELAKLKFAMEGAQAQVEQM KILLAKEREGHEADLAQAKVAAAQLLEAEMS  
AQASKEVLDKVEALSEENSKL KELVEDYEKKKALEESSAKRIEEADLKRDAIQEL  
LNRSEEQVQDLISENQLSQSEKLN LQLDNRILRQQALSMKDLELEKQDLQRNLQ  
HLEANSQALRAENQTLKQQLEQLESQDLQRNLQHLEANSQALRAENQTLKYQL  
EQLESQDLQRDLQHLEANSQALRAENQTLKQQLEQLESQDLQRNLQHLEANSQ  
ALRAENQTLKQQLEQLTSKGGTVL KIGGASSKFDISEPEPAIGETEFTEANSQALR  
AENQTLKYQLEQLESQDLQRNLQHLEANSQALRAENQTLKQQLEQLESQDLQRT  
LQHLEANSQALRAENQTLKQQLEQLTSKGGTVL KIGGASSKFDISEPEPAIGETEF  
TEANSQALRAENQTLKQQLEQLESQDLQRNLQHLEANSQALRAENQTLKQQLE  
QLESQDLQRNLQHLEANS HALRAENQTLKQQLEQLTSKGGTVL KIGGASSKFDIR  
EPEPAIGE TEFTEANSQALRAENQTLKQQLEQLESQDLQRNLQHLEANSQALRAE  
NQTLKQQLEQLESQDLQRNLQHLEANSQALRAENQTLKQQLEQLESQDLQRNL  
QHLEAKCQALRAENETL KQQLEQLESQDLQRNLQHLEANSQALRAENQTLKQQ  
LEQLTSKGGTVVKIGRAAVTRIKPTPEPVITTSYPDEQPATPGVTGPGTPSRPLGRS  
QHIRSESSDFTSLYFREDSPVPEAKPVDHEKSKMMPDKLQYLPEDSPVPEAKPVD  
QKKSMMMPDKLQYLPEDSPVPEAKPVDQKKSMMMPDKLQSDQEALLDCLMQD  
VGFSKDHPVA AVIIFKCLLQWHSFEAERTDVFDRISAIQKAIESHSDNNDVLA YW  
LSNTSTLLHLLQRTLKTGGGGGTT PRRRRQATLFRMTQRFSSQENYPNGMGP  
VGLDNVRQVEAKYPALLFKQQLSAYVEKIYGMLRDRLKKEITPLLGSCIQAPRAP  
RHQLVRKLSLTPAQQVLSHWGSIIN SLLTLLNALRGNKVPPYLVRNIFTQIFSFIN  
VQLVNSLLL RRECCSFSNGEYIKAGLAQLEHWIYEAGEEYAGDSWEELRYIRQA  
VGFLVIHQPKISLDEIINDLCPALSMQQLYRISTMYWDDKYGTHTVAPEVIQNM

RILMTEYSYNAGGNSFLLDDDDSGIPFSVDDISKSMPTVDLSQVDPPLLKNRPSFR  
FLQPGKA

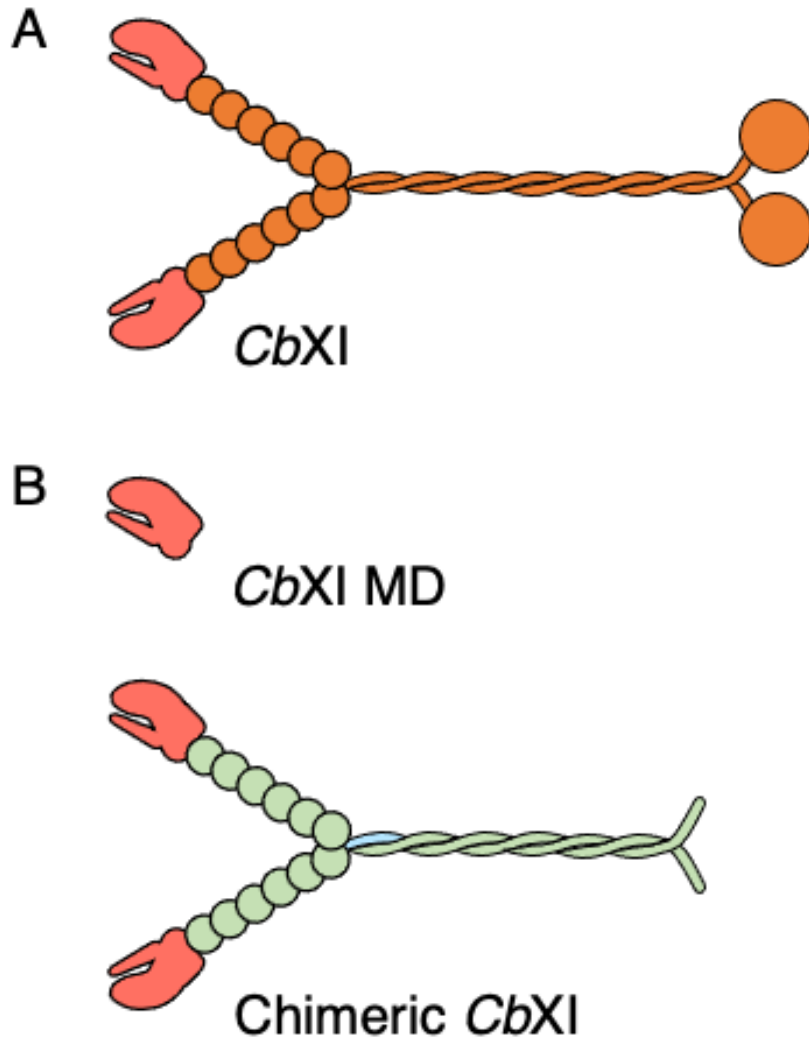

**Figure S1. Schematic diagrams showing native *CbXI* and recombinant *CbXI* constructs.** (A) *CbXI*: the domain structure of the native *CbXI*s deduced from its amino acid sequence as mentioned in Fig. 1. Each heavy chains of native *CbXI*s have 6IQ motifs to which 6 light chains bind. The light chains that bind to each IQ motif are unknown. (B) recombinant *CbXI* constructs. *CbXI MD*: a construct containing only the MD of *CbXI*. *Chimeric CbXI*: a construct containing the MD of *CbXI* (shown in red), and the 6IQ motifs and the coiled-coil domain of *AtXI-F* (shown in green). It is thought that calmodulin bind to IQ motifs of the chimeric *CbXI* because calmodulin binds to 6IQ motifs of *AtXI-F* (3).



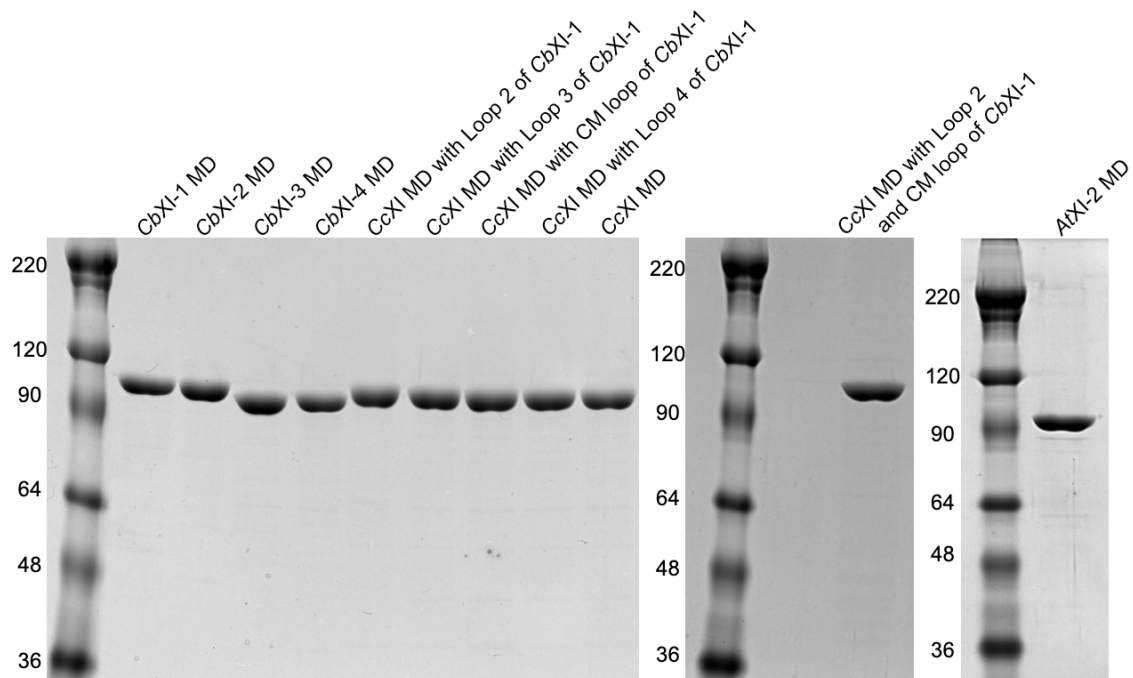

**Figure S2. SDS-PAGE of purified myosins.** Purified myosins were electrophoresed on 8% SDS-PAGE and stained with Coomassie Brilliant Blue. **Left:** *CbXI-1* MD, *CbXI-2* MD, *CbXI-3* MD, *CbXI-4* MD, *CcXI* MD with Loop 2 of *CbXI-1*, *CcXI* MD with Loop 3 of *CbXI-1*, *CcXI* MD with CM loop of *CbXI-1*, *CcXI* MD with Loop 4 of *CbXI-1*, and *CcXI* MD were analyzed using 8% SDS-PAGE and stained with Coomassie Brilliant Blue. **Center:** *CcXI* MD with Loop 2 and CM loop of *CbXI-1*. **Right:** *AtXI-2* MD. The positions of molecular mass markers are indicated on the left (kDa).

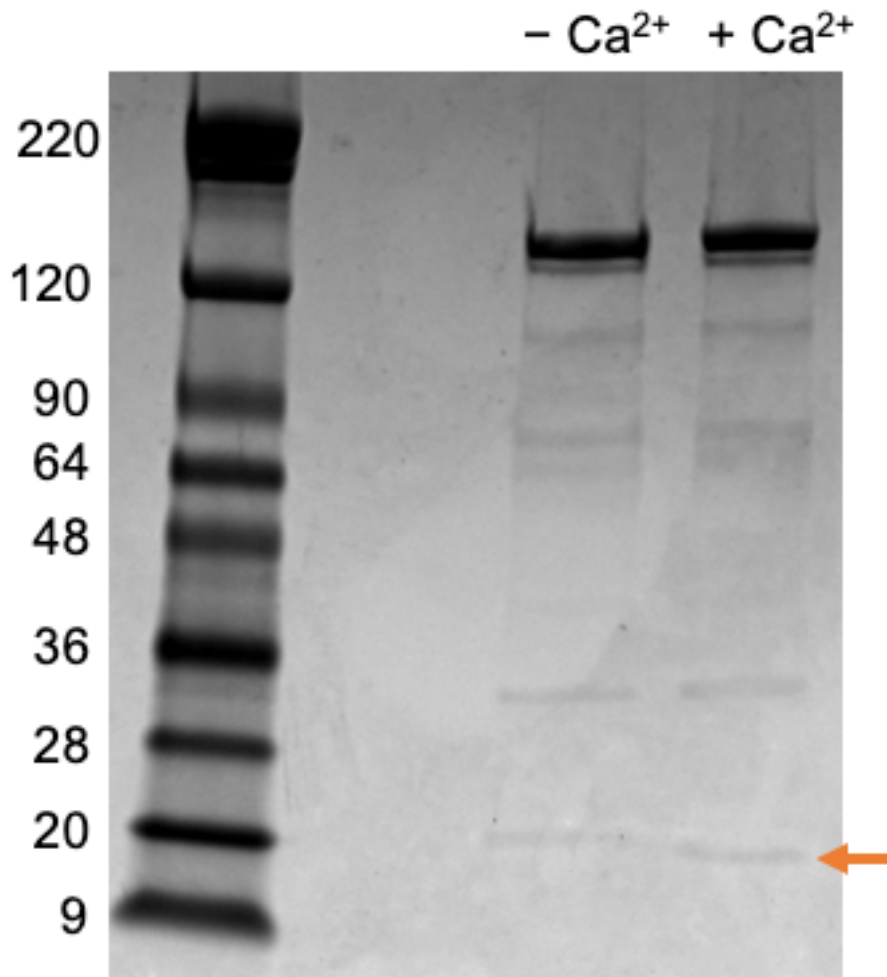

**Figure S3. SDS-PAGE of purified chimeric *CbXI-1* showing calmodulin binding.** Purified chimeric *CbXI-1* was electrophoresed on 4–20% SDS-PAGE and stained with Coomassie Brilliant Blue. Before electrophoresis, SDS samples were supplemented with 10 mM EGTA (- Ca<sup>2+</sup>) or 10 mM CaCl<sub>2</sub> (+ Ca<sup>2+</sup>). The low-molecular-weight band indicated by the red arrow with mobility shifted by Ca<sup>2+</sup> is considered to be the co-expressed *Arabidopsis* calmodulin. Note that Coomassie brilliant blue staining of calmodulin is weaker than that of myosin due to the differences in amino acid composition. The positions of molecular mass markers are indicated on the left (kDa).

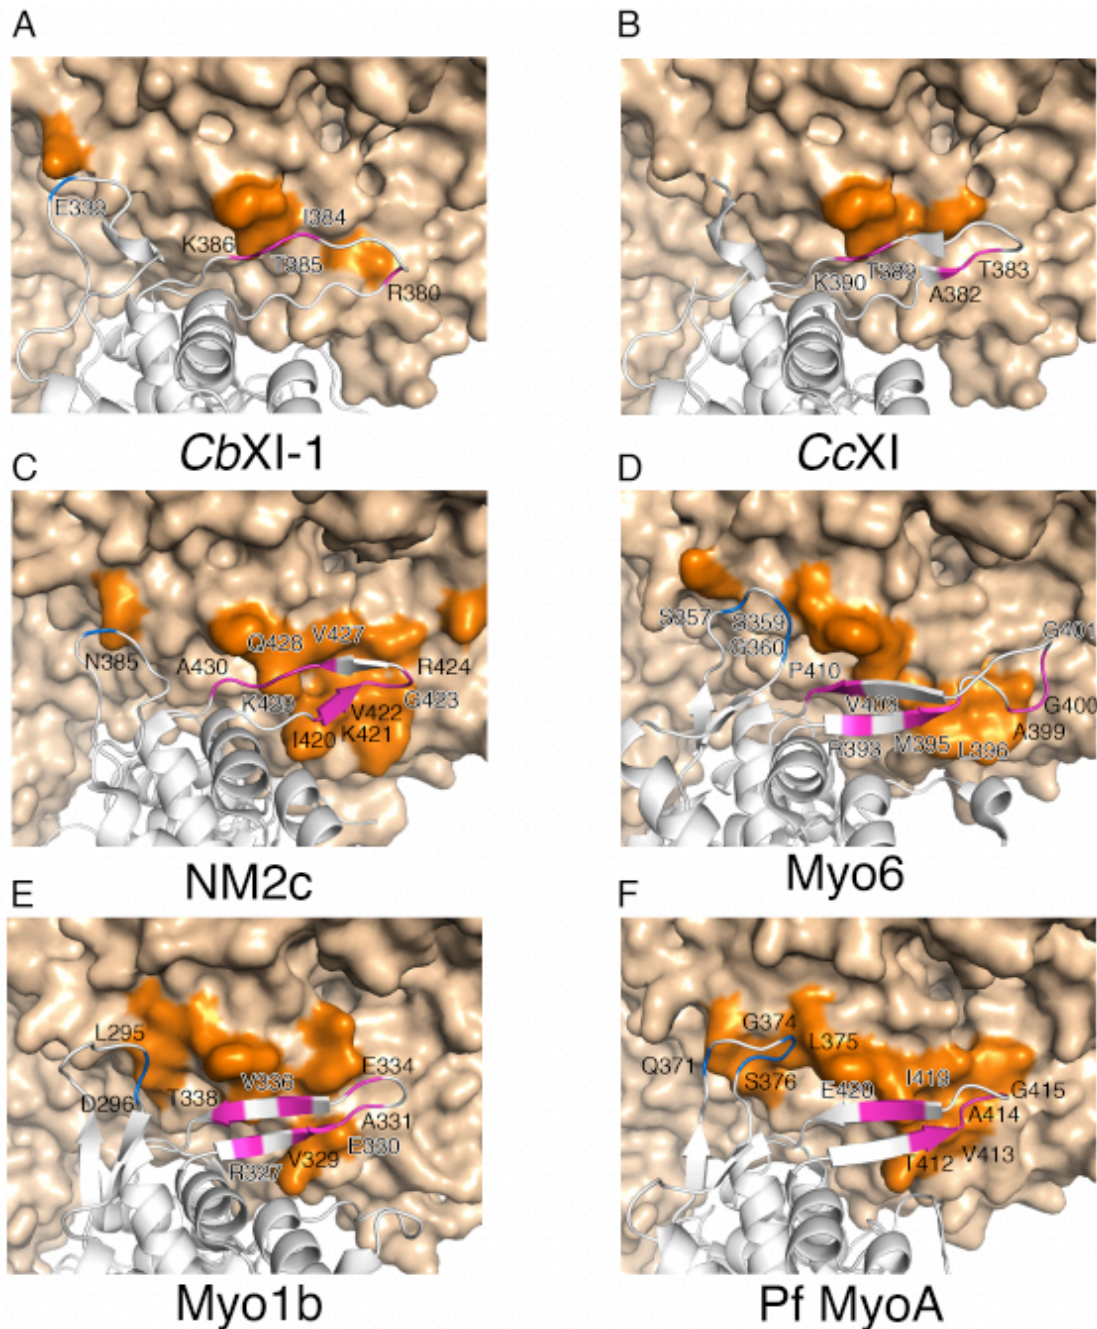

**Figure S4. Interaction of CM loop and loop4 of various myosins with actin.** The interactions of MDs (white) of *CbXI-1* (A, homology model built using PDB: 7KCH), *CcXI* (B, PDB: 7KCH), *NM2c* (C, PDB: 5JLH), *Myo6* (D, PDB: 6BNP), *Myo1b* (E, PDB: 6C1H), *Pf MyoA* (F, PDB: 7ALN) and actin (light orange) are shown as ribbon and surface representations. The residues in the actin, CM loop, and loop 4 within 4 Å between the actin and myosin are colored in orange, magenta, and blue, respectively.

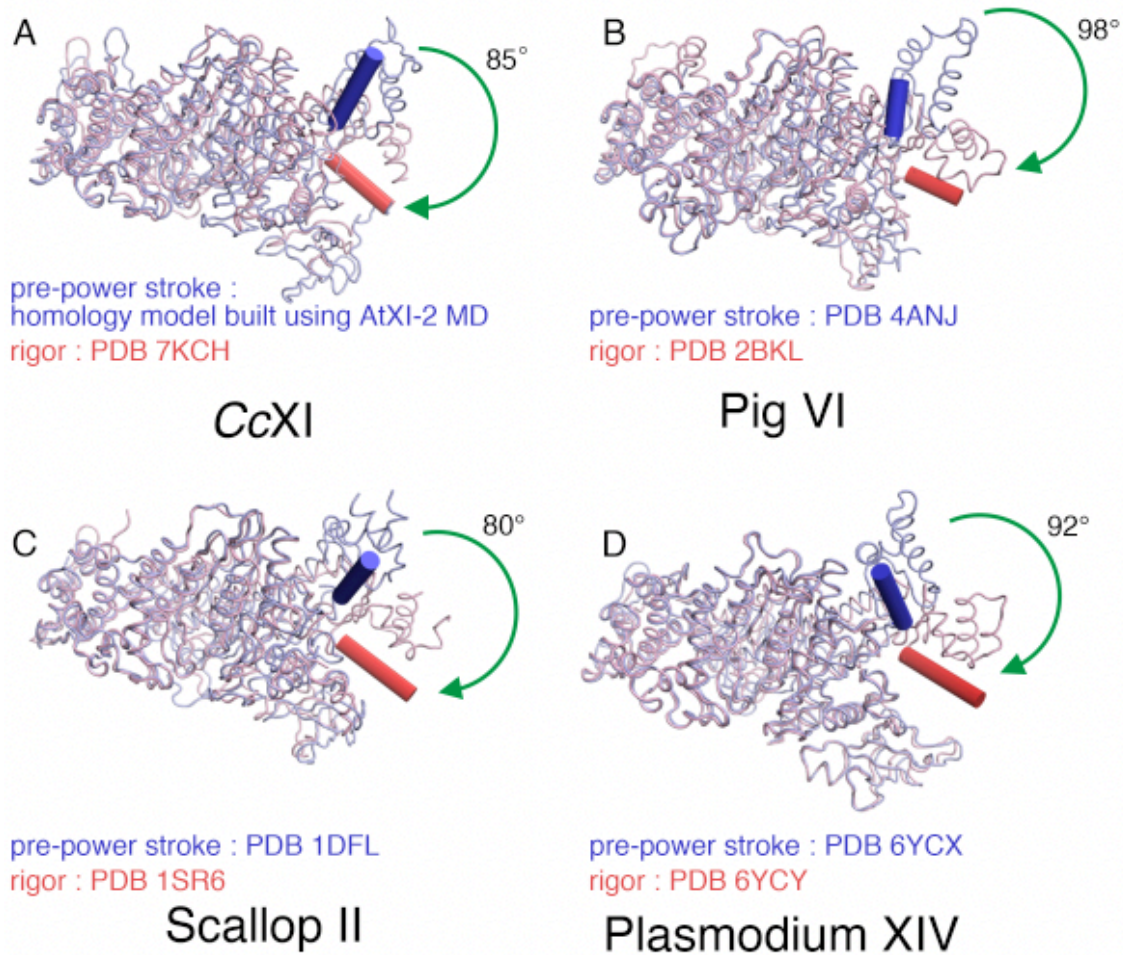

**Figure S5. Structural comparison of pre-power stroke state and rigor state.** Angular changes in the lever arm (the last helices of converter subdomain shown as syringe) between the pre-power state (blue) and rigor (red) state for *CcXI* (**A**), Pig myosin VI (**B**), Scallop myosin II (**C**), and Plasmodium myosin XIV (**D**) were examined by superimposing the structures of the two states for Upper 50k and Lower 50k subdomains. The converter subdomains are shown in darker colors.

**Table S1. Analysis of the IQ motif sequences of myosins using Pfam database**

| Myosins                       | <i>E</i> -value of 1 <sup>st</sup> IQ | <i>E</i> -value of 2 <sup>nd</sup> IQ | <i>E</i> -value of 3 <sup>rd</sup> IQ | <i>E</i> -value of 4 <sup>th</sup> IQ | <i>E</i> -value of 5 <sup>th</sup> IQ | <i>E</i> -value of 6 <sup>th</sup> IQ | Calmodulin as light chains |
|-------------------------------|---------------------------------------|---------------------------------------|---------------------------------------|---------------------------------------|---------------------------------------|---------------------------------------|----------------------------|
| Myosin XIs                    |                                       |                                       |                                       |                                       |                                       |                                       |                            |
| <i>Cc</i> XI                  | 200                                   | 0.04                                  | 0.0017                                | 1.9                                   | 0.06                                  | 5200                                  | No <sup>a</sup>            |
| <i>Cb</i> XI-1                | 90                                    | 4.6                                   | 4                                     | 160                                   | 0.051                                 | 3.6                                   | No <sup>b</sup>            |
| <i>At</i> XI-2                | 0.054                                 | 0.00052                               | 0.0031                                | 0.18                                  | 0.0000064                             | 0.16                                  | Yes <sup>c, d</sup>        |
| <i>At</i> XI-A                | 12                                    | 0.42                                  | 13                                    | 1200                                  | 0.17                                  | 0.11                                  | No <sup>d</sup>            |
| <i>At</i> XI-D                | 730                                   | 0.006                                 | 12                                    | 3                                     | 0.0014                                | 1.5                                   | No <sup>d</sup>            |
| <i>At</i> XI-F                | 0.017                                 | 0.039                                 | 0.0023                                | 6.5                                   | 0.011                                 | 0.082                                 | Yes <sup>d</sup>           |
| <i>At</i> XI-I                | 63                                    | 0.0032                                | 0.03                                  | 16                                    | 0.023                                 | 0.11                                  | No <sup>d</sup>            |
| <i>At</i> XI-J                | 460                                   | 0.0046                                | 0.037                                 | 1.5                                   | 0.00031                               | 1100                                  | No <sup>d</sup>            |
| Tobacco XI                    | 0.0068                                | 0.25                                  | 0.058                                 | 0.81                                  | 0.053                                 | 0.38                                  | Yes <sup>e</sup>           |
| Animal unconventional myosins |                                       |                                       |                                       |                                       |                                       |                                       |                            |
| Human IC                      | 0.00083                               | 0.00051                               | 63                                    | /                                     | /                                     | /                                     | Yes <sup>f</sup>           |
| Chick Va                      | 0.0017                                | 0.0009                                | 0.00094                               | 0.0047                                | 0.00034                               | 0.18                                  | Yes <sup>g</sup>           |
| Mouse Va                      | 0.0013                                | 0.0041                                | 0.000021                              | 0.00012                               | 0.0002                                | 0.17                                  | Yes <sup>h, i, j</sup>     |
| Pig VI                        | 0.018                                 | /                                     | /                                     | /                                     | /                                     | /                                     | Yes <sup>k</sup>           |
| Mouse VIIIB                   | 0.0013                                | 0.000052                              | 69                                    | 0.097                                 | 0.013                                 | /                                     | Yes <sup>l</sup>           |
| Bovine X                      | 0.003                                 | 0.0039                                | 0.057                                 | /                                     | /                                     | /                                     | Yes <sup>m, n</sup>        |

IQ motif sequences of myosins were analyzed using Pfam database (<http://pfam.xfam.org>) (24). Most of the IQ motif sequences of unconventional myosins, in which calmodulin acts light chains (indicated by Yes), fall into the typical calmodulin-binding IQ motif, especially for the 1<sup>st</sup> IQ motif sequence: Pfam *E*-values for calmodulin-binding motif of these myosins are less than 0.1. On the other hand, *E*-values of unconventional myosins, in which calmodulin does not act as light chains (indicated by No), range from several tens to several hundreds, and this is especially true for the 1<sup>st</sup> IQ motif sequence.

<sup>a</sup>(2), <sup>b</sup>this paper, <sup>c</sup>(25), <sup>d</sup>(3), <sup>e</sup>(26), <sup>f</sup>(27), <sup>g</sup>(28), <sup>h</sup>(29), <sup>i</sup>(30), <sup>j</sup>(31), <sup>k</sup>(32), <sup>l</sup>(33), <sup>m</sup>(34), <sup>n</sup>(35)



**Table S2. Crystallographic data collection and refinement statistics for *At* XI-2 MD**

---

| <b>Data collection</b>                                  |                                                       |
|---------------------------------------------------------|-------------------------------------------------------|
| Space group                                             | <i>P</i> 2 <sub>1</sub> 2 <sub>1</sub> 2 <sub>1</sub> |
| Cell dimensions                                         |                                                       |
| <i>a</i> , <i>b</i> , <i>c</i> (Å)                      | 58.28, 73.73, 187.96                                  |
| $\alpha$ , $\beta$ , $\gamma$ (°)                       | 90.0, 90.0, 90.0                                      |
| Resolution (Å)                                          | 19.81-2.84 (3.01-2.84)*                               |
| <i>R</i> <sub>merge</sub>                               | 0.132 (0.840)                                         |
| <i>I</i> / $\sigma$ <i>I</i>                            | 11.09 (2.10)                                          |
| Completeness (%)                                        | 99.1 (98.0)                                           |
| Redundancy                                              | 5.3 (5.6)                                             |
| <b>Refinement</b>                                       |                                                       |
| Resolution (Å)                                          | 19.81-2.84                                            |
| No. reflections                                         | 104235                                                |
| <i>R</i> <sub>work</sub> / <i>R</i> <sub>free</sub> (%) | 22.64/27.06                                           |
| R.m.s deviations                                        |                                                       |
| Bond lengths (Å)                                        | 0.002                                                 |
| Bond angles (°)                                         | 0.490                                                 |
| Ramachandran plot statistics (%)                        |                                                       |
| Favored regions                                         | 99.0                                                  |
| Allowed regions                                         | 1.0                                                   |
| Outliers                                                | 0.0                                                   |

---

\*Highest resolution shell is shown in parentheses.

**Table S3. List of amino acids interacting between CM loop and loop 4 of myosins and actin**

**CM loop**

| <b>Actin residues</b> | <b><i>Cc</i> XI</b> | <b><i>Cb</i> XI-1</b> | <b><i>Pf</i> MyoA</b> | <b>Pig VI</b>        | <b><i>Hs</i> NM2c</b> | <b>Rat Ib</b> |
|-----------------------|---------------------|-----------------------|-----------------------|----------------------|-----------------------|---------------|
| D27                   |                     |                       | T412<br>A414          | M395                 | I420                  | R327          |
| A28                   | A382                |                       | T412<br>V413          | L396                 | I420<br>K421<br>V422  | E330          |
| P29                   |                     | R380                  | A414<br>G415          | A399                 | K421<br>V422<br>G423  |               |
| R30                   |                     |                       |                       | A399<br>G400<br>G401 | G423                  |               |
| V32                   |                     |                       |                       |                      | V422<br>G423          |               |
| D58                   |                     |                       |                       |                      | R424                  |               |
| P335                  | T389                | I384<br>T385          | E420<br>I419          | V409<br>P410         | V427<br>A430          | V336<br>T338  |
| E336                  | K390                | K386                  | I419<br>T412          | M395<br>R393<br>V409 | Q428<br>K429          | V329<br>T338  |
| K338                  |                     |                       |                       |                      |                       | E334          |
| Y339                  | T383                |                       |                       |                      | V422                  | A331<br>E334  |
| I343                  |                     |                       |                       | R393                 |                       |               |

**Loop 4**

| Actin residues | <i>Cc</i> XI | <i>Cb</i> XI-1 | <i>Pf</i> MyoA | Pig VI       | <i>Hs</i> NM2c | Rat Ib |
|----------------|--------------|----------------|----------------|--------------|----------------|--------|
| R149           |              |                | S376           |              |                | D296   |
| K328           |              | E339           |                |              |                |        |
| K330           |              |                | Q371<br>S376   | S357         | N385           |        |
| I331           |              |                | S376           |              |                | L295   |
| I332           |              |                |                |              |                | L295   |
| A333           |              |                | G374<br>L375   | S359<br>G360 |                | L295   |
| P334           |              |                | L375           | S359<br>G360 |                |        |
| P335           |              |                |                | S359         |                |        |

Amino acid residues of loop 4 and CM loop with a distance of 4 Å or less from actin are shown. The amino acid residues of actin are based on the sequence of alpha skeletal muscle, *Gallus gallus* (PDBID: 7KCH). *Cc* XI: (36) (PDBID: 7KCH), Rat Ib: (37) (PDBID: 6C1H), *Cb* XI-1: (this paper), *Pf* MyoA, *Plasmodium falciparum* myosin A (38) (PDBID: 7ALN), Pig myosin VI: (39) (PDBID: 6BNP), *Hs* NM2c: *Homo sapiens* non-muscle myosin 2c (40) (PDBID: 5JLH)



Table S4. Expression levels of *CbXIs* in *Chara braunii*

| <b>RNA-Seq (FPKM)</b> |                    |                |                   |               |
|-----------------------|--------------------|----------------|-------------------|---------------|
|                       | <b>Whole plant</b> | <b>oogonia</b> | <b>antheridia</b> | <b>zygote</b> |
| <i>CbXI-1</i>         | 28.57              | 22.96          | 14.62             | 0.70          |
| <i>CbXI-2</i>         | 3.96               | 15.17          | 6.13              | 13.59         |
| <i>CbXI-3</i>         | 2.77               | 12.10          | 5.18              | 13.70         |
| <i>CbXI-4</i>         | 3.95               | 8.42           | 8.33              | 2.94          |

data from (1)

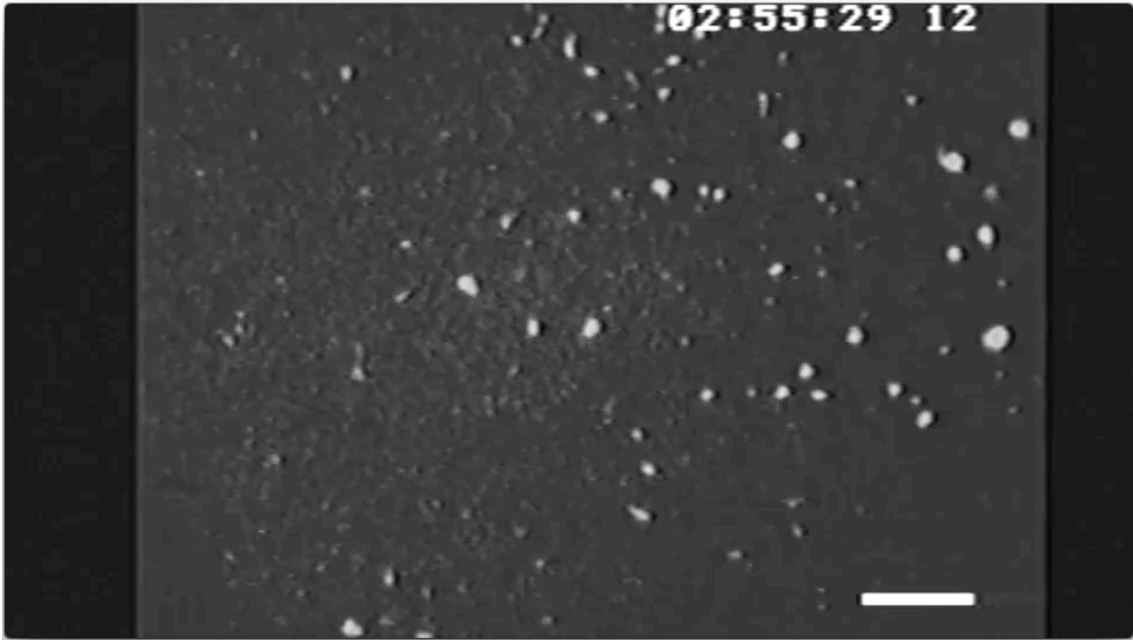

**Movies S1.** *in vitro* motility assay of chimeric *CbXI-1* (real time).

## References for Supplementary Information

1. T. Nishiyama *et al.*, The Chara Genome: Secondary Complexity and Implications for Plant Terrestrialization. *Cell* **174**, 448-464 e424 (2018).
2. K. Ito *et al.*, Kinetic mechanism of the fastest motor protein, Chara myosin. *J Biol Chem* **282**, 19534-19545 (2007).
3. T. Haraguchi *et al.*, Functional Diversity of Class XI Myosins in Arabidopsis thaliana. *Plant Cell Physiol* **59**, 2268-2277 (2018).
4. K. Ito, Y. Yamaguchi, K. Yanase, Y. Ichikawa, K. Yamamoto, Unique charge distribution in surface loops confers high velocity on the fast motor protein Chara myosin. *Proc Natl Acad Sci U S A* **106**, 21585-21590 (2009).
5. T. Haraguchi *et al.*, Molecular Characterization and Subcellular Localization of Arabidopsis Class VIII Myosin, ATM1. *J Biol Chem* **289**, 12343-12355 (2014).
6. W. Kabsch, Xds. *Acta Crystallogr D Biol Crystallogr* **66**, 125-132 (2010).
7. A. J. McCoy *et al.*, Phaser crystallographic software. *J Appl Crystallogr* **40**, 658-674 (2007).
8. P. Emsley, K. Cowtan, Coot: model-building tools for molecular graphics. *Acta Crystallogr D Biol Crystallogr* **60**, 2126-2132 (2004).
9. P. D. Adams *et al.*, PHENIX: a comprehensive Python-based system for macromolecular structure solution. *Acta Crystallogr D Biol Crystallogr* **66**, 213-221 (2010).
10. S. C. Lovell *et al.*, Structure validation by Calpha geometry: phi,psi and Cbeta deviation. *Proteins* **50**, 437-450 (2003).
11. B. Webb, A. Sali, Comparative Protein Structure Modeling Using MODELLER. *Curr Protoc Bioinformatics* **54**, 5 6 1-5 6 37 (2016).
12. F.-W. Li *et al.*, Fern genomes elucidate land plant evolution and cyanobacterial symbioses. *Nature Plants* **4**, 460-472 (2018).
13. J. L. Bowman *et al.*, Insights into Land Plant Evolution Garnered from the Marchantia polymorpha Genome. *Cell* **171**, 287-304.e215 (2017).
14. F.-W. Li *et al.*, Anthoceros genomes illuminate the origin of land plants and the unique biology of hornworts. *Nature Plants* **6**, 259-272 (2020).
15. S. Cheng *et al.*, Genomes of Subaerial Zygnematophyceae Provide Insights into Land Plant Evolution. *Cell* **179**, 1057-1067.e1014 (2019).
16. K. Katoh, D. M. Standley, MAFFT multiple sequence alignment software version 7: improvements in performance and usability. *Mol Biol Evol* **30**, 772-780 (2013).
17. W. P. Maddison, D. R. Maddison, Mesquite: a modular system for evolutionary analysis. *Version 3.61* <http://www.mesquiteproject.org> (2019).
18. A. Stamatakis, RAxML version 8: a tool for phylogenetic analysis and post-analysis of large phylogenies. *Bioinformatics* **30**, 1312-1313 (2014).
19. J. Felsenstein, PHYLIP (Phylogeny Inference Package) version 3.697. (Distributed by the author. Department of Genome Sciences, University of Washington, Seattle.). (2017).
20. S. F. Altschul *et al.*, Gapped BLAST and PSI-BLAST: a new generation of protein database search programs. *Nucleic Acids Res* **25**, 3389-3402 (1997).
21. G. Robertson *et al.*, De novo assembly and analysis of RNA-seq data. *Nature Methods* **7**, 909-912 (2010).

22. M. Stanke *et al.*, AUGUSTUS: ab initio prediction of alternative transcripts. *Nucleic Acids Research* **34**, W435-W439 (2006).
23. E. Lee *et al.*, Web Apollo: a web-based genomic annotation editing platform. *Genome Biology* **14**, R93 (2013).
24. A. Bateman *et al.*, The Pfam protein families database. *Nucleic Acids Research* **32**, D138-D141 (2004).
25. M. Tominaga *et al.*, Cytoplasmic streaming velocity as a plant size determinant. *Dev Cell* **27**, 345-352 (2013).
26. M. Tominaga *et al.*, Higher plant myosin XI moves processively on actin with 35 nm steps at high velocity. *EMBO J* **22**, 1263-1272 (2003).
27. M. El\_Mezgueldi, N. Tang, S. S. Rosenfeld, E. M. Ostap, The kinetic mechanism of Myo1e (human myosin-1C). *J. Biol. Chem.* **277**, 21514-21521 (2002).
28. E. M. De\_La\_Cruz, A. L. Wells, S. S. Rosenfeld, E. M. Ostap, H. L. Sweeney, The kinetic mechanism of myosin V. *Proc. Natl. Acad. Sci. USA* **96**, 13726-13731 (1999).
29. K. Homma, J. Saito, R. Ikebe, M. Ikebe, Ca(2+)-dependent regulation of the motor activity of myosin V. *J. Biol. Chem.* **275**, 34766-34771 (2000).
30. F. Wang *et al.*, Effect of ADP and ionic strength on the kinetic and motile properties of recombinant mouse myosin V. *J Biol Chem* **275**, 4329 - 4335 (2000).
31. K. M. Trybus, E. Kremmentsova, Y. Freyzon, Kinetic characterization of a monomeric unconventional myosin V construct. *J. Biol. Chem.* **274**, 27448-27456 (1999).
32. A. L. Wells *et al.*, Myosin VI is an actin-based motor that moves backwards. *Nature* **401**, 505-508 (1999).
33. A. Henn, E. M. De La Cruz, Vertebrate myosin VIIb is a high duty ratio motor adapted for generating and maintaining tension. *J Biol Chem* **280**, 39665-39676 (2005).
34. K. Homma, M. Ikebe, Myosin X is a high duty ratio motor. *J Biol Chem* **280**, 29381 - 29391 (2005).
35. M. Kovacs, F. Wang, J. R. Sellers, Mechanism of action of myosin X, a membrane-associated molecular motor. *J Biol Chem* **280**, 15071 - 15083 (2005).
36. P. V. Ruijgrok *et al.*, Optical control of fast and processive engineered myosins in vitro and in living cells. *Nat Chem Biol* 10.1038/s41589-021-00740-7 (2021).
37. A. Menten *et al.*, High-resolution cryo-EM structures of actin-bound myosin states reveal the mechanism of myosin force sensing. *Proc Natl Acad Sci U S A* **115**, 1292-1297 (2018).
38. J. Robert-Paganin *et al.*, The actomyosin interface contains an evolutionary conserved core and an ancillary interface involved in specificity. *Nat Commun* **12**, 1892 (2021).
39. P. S. Gurel *et al.*, Cryo-EM structures reveal specialization at the myosin VI-actin interface and a mechanism of force sensitivity. *Elife* **6** (2017).
40. J. von der Ecken, S. M. Heissler, S. Pathan-Chhatbar, D. J. Manstein, S. Raunser, Cryo-EM structure of a human cytoplasmic actomyosin complex at near-atomic resolution. *Nature* **534**, 724-728 (2016).
